# Supplementary material for: Expression and Function of PML-RARA in the Hematopoietic Progenitor Cells of Ctsg-PML-RARA Mice
Source: PLoS One. 2012 Oct 8;7(10):e46529. doi: 10.1371/journal.pone.0046529 (PMC3466302; doi:10.1371/journal.pone.0046529)
Supplement: Table S10 — Ctsg-PML-RARA versus WT CMP SAM Results. (XLSX) [file pone.0046529.s020.xlsx]

## Sheet: Table S10. CMP SAM Results
Current settings
Input parameters
Data type?								Two class unpaired
Array or Seq data?								array
Arrays centered?								FALSE
Delta								2.5
Minimum fold change								2
Test statistic								standard
Are data are log scale?								FALSE
Number of permutations								100
Input percentile for exchangeability factor s0								Automatic choice
Number of neighbors for KNN								10
Seed for Random number generator								56499444
Computed values
Estimate of pi0 (proportion of null genes)								0.768
s0 percentile								5
False Discovery Rate (%)								0
List of Significant Genes for Delta = 2.5
Positive genes (13)
	Row	Gene ID	Gene Name	Score(d)	Numerator(r)	Denominator(s+s0)	Fold Change	q-value(%)	localfdr(%)
	89245	5295574	Tcirg1	14.3542	2834.1	197.44	2.93807	0	4.6048
	17939	4504622	Ccnh	9.4733	650.811	68.6995	2.19217	0	5.32199
	22823	4559141	Adss	9.03238	700.428	77.5463	2.09154	0	5.25402
	116411	5598001	Tcirg1	8.65207	829.733	95.9	3.53591	0	5.17493
	758	4313679	Agpat5	8.23036	1145.93	139.232	2.35053	0	5.06273
	62229	4996178	Psap	7.53005	925.671	122.93	2.58754	0	4.82547
	63335	5008357	Arap1	7.51836	729.616	97.0446	2.51168	0	4.82092
	56771	4936233	Adss	7.45091	573.609	76.985	2.05499	0	4.79415
	115466	5587707	Psap	7.34751	937.173	127.55	2.34043	0	4.75126
	13679	4456996	Cd93	7.32316	1073.01	146.522	2.98676	0	4.74081
	118318	4435965	---	7.2871	660.588	90.6517	2.24951	0	4.72508
	36993	4716885	Fgd2	7.24364	546.38	75.4289	3.61575	0	4.70574
	99041	5405411	Irf8	7.23186	1935.21	267.595	4.16048	0	4.70042
Negative genes (24)
	Row	Gene ID	Gene Name	Score(d)	Numerator(r)	Denominator(s+s0)	Fold Change	q-value(%)	localfdr(%)
	113593	5566676	Cpa3	-12.2876	-4512.23	367.218	0.124233	0	100
	32898	4670975	Cpa3	-11.2168	-2100.13	187.231	0.108497	0	63.9711
	12903	4448551	Cpa3	-11.1054	-6458.56	581.568	0.201715	0	58.7202
	64764	5025075	Clec2i	-10.7985	-1774.44	164.322	0.0759639	0	46.1213
	38197	4730198	Cpa3	-9.18244	-4527.44	493.055	0.15476	0	17.9259
	89530	5298792	Cpa3	-9.16622	-4285.68	467.551	0.114881	0	17.8725
	23707	4569476	Cpa3	-8.78822	-4130.32	469.983	0.150399	0	17.3053
	52358	4887066	Cdh1	-8.63155	-2286.99	264.957	0.10767	0	17.3533
	100622	5423213	Clec2h	-7.82222	-1227.46	156.92	0.184533	0	18.3811
	62516	4999412	Cdh1	-7.70539	-1340.06	173.912	0.0578831	0	18.516
	109749	5524069	Cpa3	-7.66564	-1922.29	250.767	0.123812	0	18.558
	59686	4968318	Clec2d	-7.33164	-2364.73	322.538	0.460294	0	18.8422
	53490	4899368	Cpa3	-7.26189	-2116.31	291.427	0.124331	0	18.8889
	38631	4735053	Mcpt8	-6.98135	-2150.52	308.039	0.243383	0	19.0511
	15160	4473882	Mcpt8	-6.96952	-2750.89	394.703	0.382307	0	19.0577
	48861	4848579	Cpa3	-6.96287	-4652.35	668.166	0.216407	0	19.0614
	78456	5177549	Plp2	-6.90472	-1676.34	242.781	0.483546	0	19.0947
	59053	4961127	Emilin2	-6.62407	-744.271	112.358	0.434353	0	19.296
	68627	5067477	Sipa1l1	-6.58141	-785.811	119.398	0.478276	0	19.3361
	91242	5317388	Cpa3	-6.57798	-3901.67	593.141	0.156173	0	19.3395
	73785	5125773	Cpa3	-6.56258	-1612.72	245.744	0.131638	0	19.355
	144	4306486	Txnip	-6.50985	-1288.53	197.936	0.471317	0	19.4118
	52855	4892372	Clec4d	-6.50901	-830.441	127.583	0.297123	0	19.4128
	99737	5413561	Il2rg	-6.50492	-1371.4	210.825	0.351818	0	19.4175
	Estimated Miss rates for Delta=2.5
		Quantiles	Cutpoints	Miss Rate(%)
		0 -> 0.05	-6.473 -> -1.133	0
		0.05 -> 0.1	-1.133 -> -0.764	0
		0.1 -> 0.15	-0.764 -> -0.53	0
		0.15 -> 0.2	-0.53 -> -0.338	0
		0.2 -> 0.25	-0.338 -> -0.165	0
		0.25 -> 0.75	-0.165 -> 1.16	23.61
		0.75 -> 0.8	1.16 -> 1.329	59.66
		0.8 -> 0.85	1.329 -> 1.535	65.48
		0.85 -> 0.9	1.535 -> 1.805	71.61
		0.9 -> 0.95	1.805 -> 2.254	76.76
		0.95 -> 1	2.254 -> 7.036	83.2
