# Supplementary material for: Expression and Function of PML-RARA in the Hematopoietic Progenitor Cells of Ctsg-PML-RARA Mice
Source: PLoS One. 2012 Oct 8;7(10):e46529. doi: 10.1371/journal.pone.0046529 (PMC3466302; doi:10.1371/journal.pone.0046529)
Supplement: Table S11 — Ctsg-PML-RARA versus WT GMP SAM Results. (XLSX) [file pone.0046529.s021.xlsx]

## Sheet: Table S11. GMP SAM Results
Current settings
Input parameters
Data type?								Two class unpaired
Array or Seq data?								array
Arrays centered?								FALSE
Delta								2.32628
Minimum fold change								2
Test statistic								standard
Are data are log scale?								FALSE
Number of permutations								100
Input percentile for exchangeability factor s0								Automatic choice
Number of neighbors for KNN								10
Seed for Random number generator								41930353
Computed values
Estimate of pi0 (proportion of null genes)								0.828
s0 percentile								5
False Discovery Rate (%)								0
List of Significant Genes for Delta = 2.326
Positive genes (20)
	Row	Gene ID	Gene Name	Score(d)	Numerator(r)	Denominator(s+s0)	Fold Change	q-value(%)	localfdr(%)
	54959	4975162	Irf8	8.58803	2114.45	246.21	3.51316	0	2.50291
	54963	5405411	Irf8	8.40061	1879.57	223.742	4.24427	0	2.38422
	88545	4542913	Rasa3	7.70957	311.274	40.3749	2.48719	0	1.82845
	5481	5048322	5730494M16Rik	7.41519	778.602	105.001	3.89663	0	1.54898
	52755	5287190	Ifi203	7.14337	720.904	100.919	3.11224	0	1.28286
	54965	5598827	Irf8	7.00353	1222.12	174.5	3.03252	0	1.14714
	22261	5379307	Cd24a	6.8209	1073.01	157.312	2.43041	0	0.976007
	53123	4448286	Igh-6	6.71173	1945.44	289.857	2.33621	0	0.879847
	8583	5203863	Adcy7	6.70041	601.327	89.7448	2.9063	0	0.870235
	97978	5042238	Slc19a1	6.66957	378.072	56.686	2.39708	0	0.844404
	22255	4706914	Cd24a	6.42938	1817.49	282.685	2.69204	0	0.666051
	93312	4958838	Rsl1d1	6.15301	628.531	102.15	2.12426	0	0.52785
	28481	5087716	Csf1r	6.14702	1329.59	216.299	2.71907	0	0.525852
	22547	4456996	Cd93	6.04799	1132.92	187.323	3.21176	0	0.499951
	15327	5477665	Atp2b4	5.95718	389.831	65.4388	3.47759	0	0.488838
	54958	4657407	Irf8	5.89043	400.307	67.9589	4.38934	0	0.489111
	93960	5166442	Samhd1	5.74474	806.391	140.37	3.02698	0	0.517282
	22562	4722329	Cd97	5.74025	396.774	69.1214	2.13915	0	0.518795
	69440	5498336	Ncf1	5.7035	807.498	141.579	2.65067	0	0.532694
	61004	4896625	Lyar	5.69257	661.444	116.194	2.07935	0	0.537364
Negative genes (12)
	Row	Gene ID	Gene Name	Score(d)	Numerator(r)	Denominator(s+s0)	Fold Change	q-value(%)	localfdr(%)
	27566	4448551	Cpa3	-22.7934	-7161.19	314.179	0.199786	0	100
	27569	4730198	Cpa3	-10.4633	-5620.56	537.169	0.141775	0	62.2333
	27567	4569476	Cpa3	-10.2271	-4650.12	454.685	0.147183	0	61.8451
	27575	5298792	Cpa3	-9.61294	-5248.56	545.989	0.121835	0	60.3287
	23015	4887066	Cdh1	-9.47265	-3502.52	369.751	0.0513885	0	59.9291
	27577	5317388	Cpa3	-8.92426	-4215.59	472.375	0.140564	0	58.242
	27578	5524069	Cpa3	-8.21984	-2614.17	318.032	0.0988551	0	56.1907
	27579	5566676	Cpa3	-8.03124	-5407.81	673.347	0.127222	0	55.806
	27568	4670975	Cpa3	-7.59243	-2783.79	366.653	0.101461	0	55.2477
	27570	4848579	Cpa3	-7.28639	-5666.3	777.656	0.1978	0	55.1155
	53599	5413561	Il2rg	-6.9929	-1537.39	219.85	0.356915	0	55.1419
	23007	4463258	Cdh1	-6.25227	-1676.6	268.159	0.0714529	0	55.5603
	Estimated Miss rates for Delta=2.32628474634237
		Quantiles	Cutpoints	Miss Rate(%)
		0 -> 0.05	-6.028 -> -1.012	0
		0.05 -> 0.1	-1.012 -> -0.734	0
		0.1 -> 0.15	-0.734 -> -0.543	0
		0.15 -> 0.2	-0.543 -> -0.382	0
		0.2 -> 0.25	-0.382 -> -0.238	0
		0.25 -> 0.75	-0.238 -> 1.053	13.99
		0.75 -> 0.8	1.053 -> 1.224	51.66
		0.8 -> 0.85	1.224 -> 1.423	61.3
		0.85 -> 0.9	1.423 -> 1.689	68.32
		0.9 -> 0.95	1.689 -> 2.121	76.03
		0.95 -> 1	2.121 -> 5.676	85.31
